# Supplementary material for: In situinsight into thermally-induced reversible transitions of the crystal structure and photoluminescence properties in a Cu2Te nanoplate
Source: Royal Society of Chemistry journal article supplement (doi:10.1039/d1ta07277c), 2021-01-01
Supplement: d1ta07277c1.pdf [file d1ta07277c1.pdf]

**Supporting information**

**In Situ Insight into Thermally-Induced Reversible Transitions of  
Crystal Structure and Photoluminescence Properties in Cu<sub>2</sub>Te  
Nanoplate**

Yanan Zhang,<sup>a</sup> Zhi Zhang,<sup>\*a</sup> Weifeng Liu,<sup>a</sup> Yifan Zheng,<sup>a</sup> Yonghui Wu,<sup>a</sup> Jun Su,<sup>a</sup>

Nishuang Liu<sup>a</sup> and Yihua Gao<sup>a</sup>

<sup>a</sup>School of Physics & Wuhan National Laboratory for Optoelectronics (WNLO),  
Huazhong University of Science and Technology (HUST), Luoyu Road 1037, Wuhan  
430074, P. R. China

\*Address correspondence to: [zzhang@hust.edu.cn](mailto:zzhang@hust.edu.cn)

The crystal structure of  $\text{Cu}_2\text{Te}$  at room temperature was investigated by XRD and all the diffraction peaks in the XRD pattern (Fig.S1a) can be indexed to the hexagonal  $\alpha$ - $\text{Cu}_2\text{Te}$  with the space group of  $P3m1$  and lattice parameters of  $a = b = 8.367 \text{ \AA}$ ,  $c = 21.627 \text{ \AA}$  (PDF 57-0477). Moreover,  $\text{Cu}_2\text{Te}$  shows no other diffraction peaks in its XRD pattern, suggesting its high purity. The chemical composition of  $\text{Cu}_2\text{Te}$  was studied by the quantitative analysis of EDS spectrum (Fig.S1b) in TEM. It can be seen that the atom ratio of Cu and Te elements in the sample is close to 2:1.

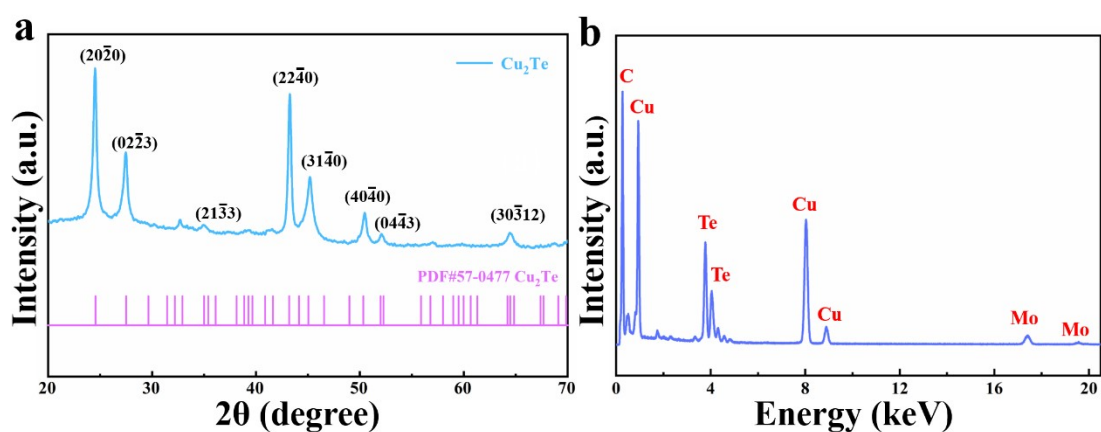

**Fig.S1** (a) XRD pattern of  $\text{Cu}_2\text{Te}$  nanoplate. Sky blue line: experimental XRD pattern at room temperature; Pink line: standard PDF card 57-0477. (b) Spot EDS spectrum of  $\text{Cu}_2\text{Te}$  nanoplate.

The morphology, crystallinity and microstructure of  $\text{Cu}_2\text{Te}$  were investigated by TEM. Fig.S2a shows the bright-field TEM image of a typical  $\text{Cu}_2\text{Te}$ , in which well-defined facets can be clearly observed in the nanoplate. Selected area electron diffraction (SAED) was used to determine the crystal structure and crystallinity of  $\text{Cu}_2\text{Te}$  nanoplate and Fig.S2b shows such a SAED pattern taken from the [0001] zone axis. Detailed analysis on the SAED pattern indicates that the  $\text{Cu}_2\text{Te}$  nanoplate crystallizes in single crystalline and hexagonal structure with the space group of  $P3m1$  (PDF 57-0477,  $\alpha\text{-Cu}_2\text{Te}$ ). Based on the SAED pattern, the orientation and facets of  $\text{Cu}_2\text{Te}$  nanoplate can be determined, as labeled in Fig.S2a. In addition, the high-resolution TEM image was collected and displayed in Fig.S2c, in which the  $(\bar{1}100)$  and  $(01\bar{1}0)$  planes can be clearly resolved. The atomic configuration of  $\alpha\text{-Cu}_2\text{Te}$  projected along the [0001] direction is shown in Fig.S2d, from which the atomic arrangement of  $(\bar{1}100)$  and  $(01\bar{1}0)$  planes can be distinguished, respectively. To further confirm the crystal structure of  $\alpha\text{-Cu}_2\text{Te}$ , the SAED pattern simulation was performed based on cif file from Crystallography Open Database using the Crystal Maker software. Fig.S2e shows the simulated SAED pattern along the [0001] zone axis. It can be seen that the experimental and simulated SAED patterns are consistent. The atomic structure of  $\alpha\text{-Cu}_2\text{Te}$  is illustrated in Fig.S2f in which large d-spacing along the c-axis can be seen. The EDS mappings were carried out to reveal the elemental distribution in  $\alpha\text{-Cu}_2\text{Te}$ , and the results in Fig.S2g suggest the uniform distribution of Cu and Te elements in the sample.

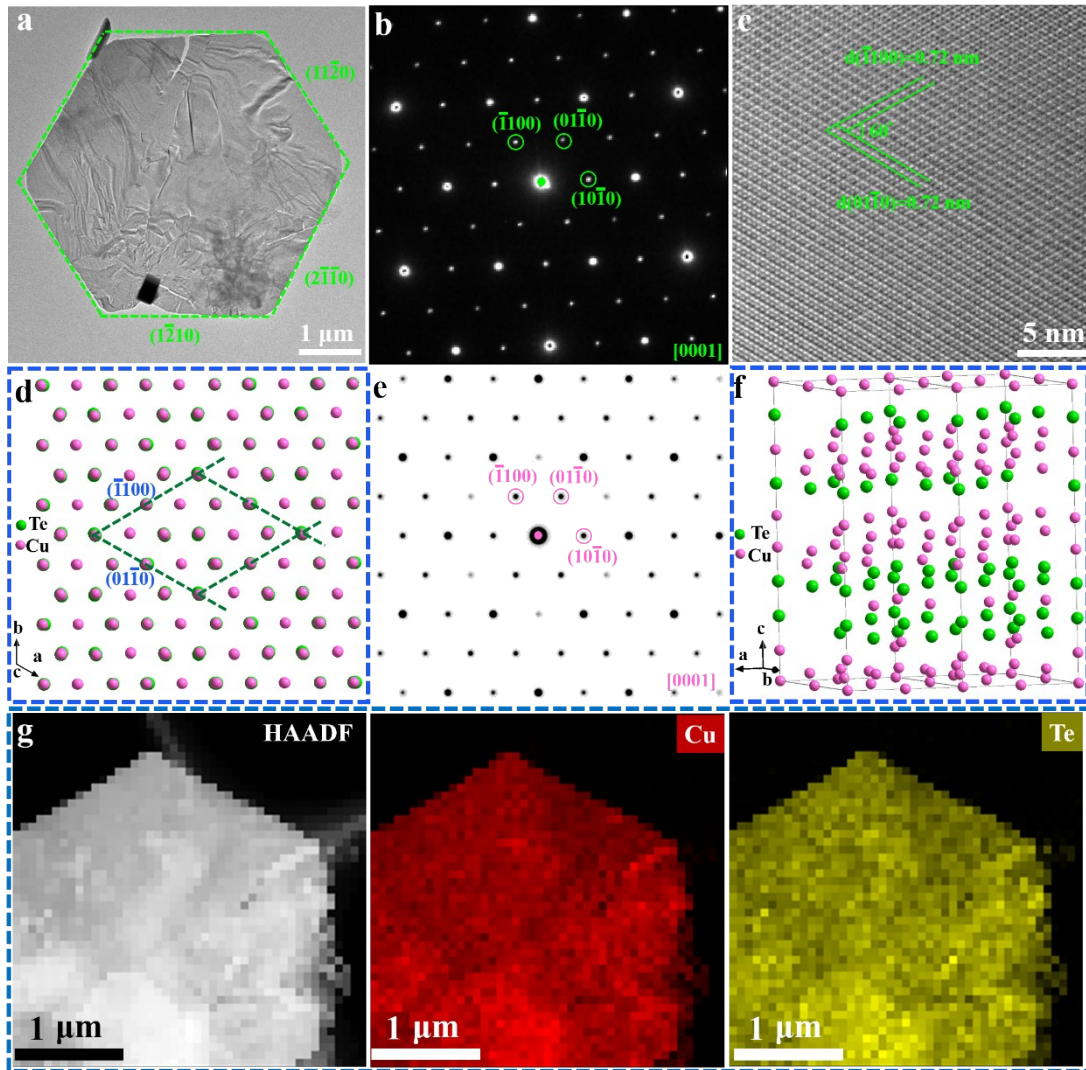

**Fig.S2** (a) Bright-field TEM image of  $\text{Cu}_2\text{Te}$  nanoplate. (b) SAED pattern taken from  $[0001]$  zone axis. (c) High-resolution TEM image of  $\text{Cu}_2\text{Te}$  nanoplate. (d) Crystal structure of  $\text{Cu}_2\text{Te}$  viewed along  $[0001]$  direction. (e) Simulated SAED pattern of  $\text{Cu}_2\text{Te}$  along  $[0001]$  zone axis. (f) Atom structure of  $\text{Cu}_2\text{Te}$  with the space group of  $P3m1$  (PDF 57-0477,  $\alpha\text{-Cu}_2\text{Te}$ ). (g) EDS elemental mappings of  $\text{Cu}_2\text{Te}$  nanoplate.

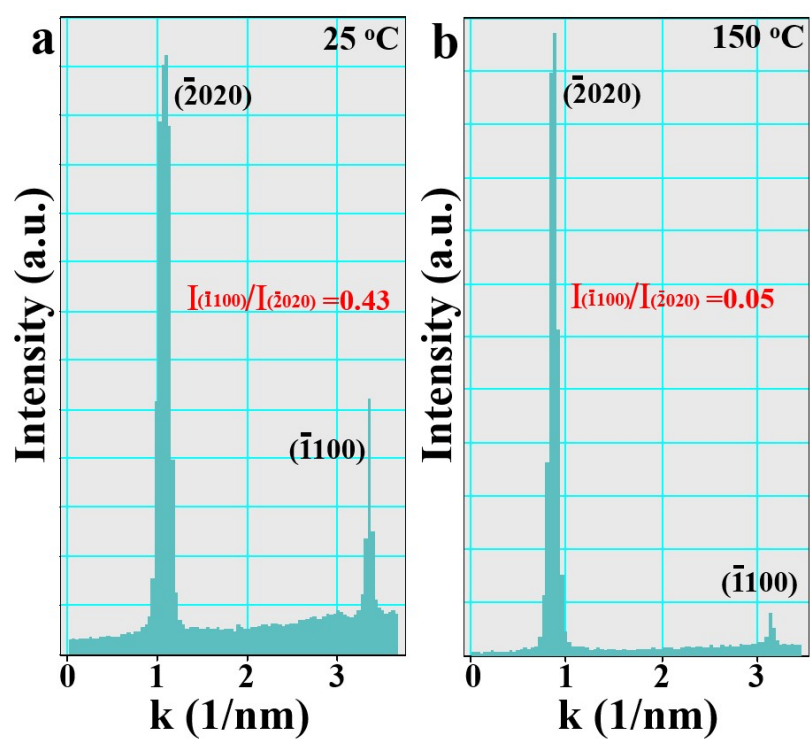

**Fig.S3** Intensity profile of  $(\bar{1}100)$  and  $(\bar{2}020)$  diffraction spots from Fig.1a-b.

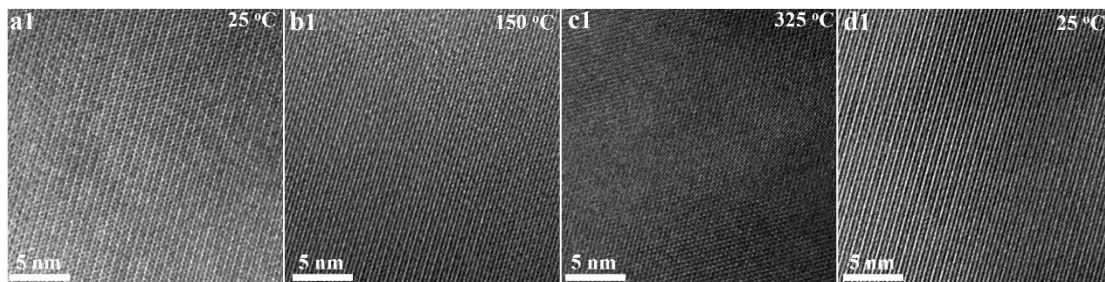

Fig.S4 The high-resolution TEM images shown in Figure 2.

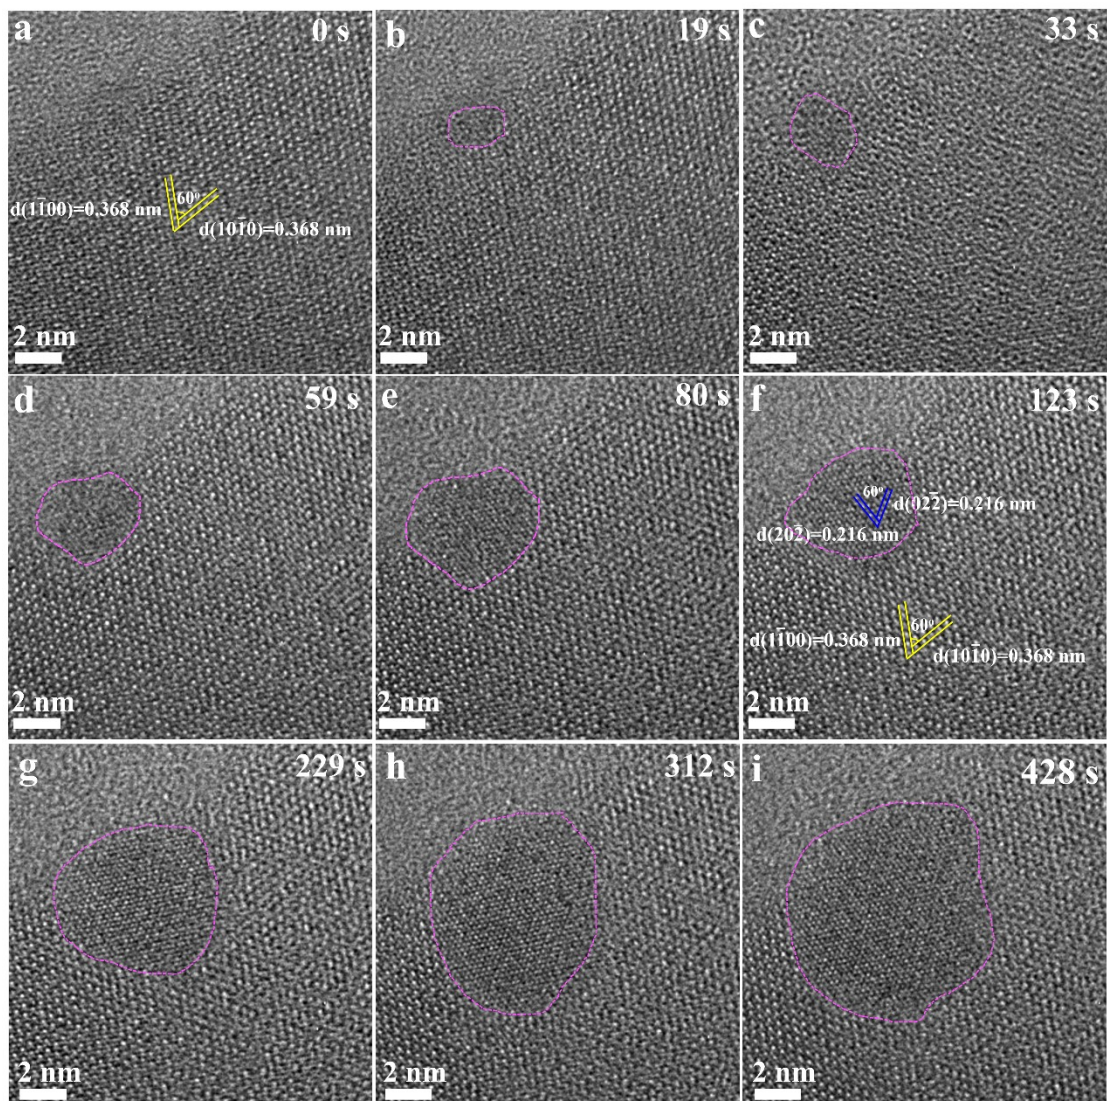

**Fig.S5** The structural evolution of  $\text{Cu}_2\text{Te}$  nanoplate at elevated temperature of  $575\text{ }^\circ\text{C}$ .

(a-i) Time-resolved high-resolution TEM images series at (a) 0 s, (b) 19 s, (c) 33 s, (d) 59 s, (e) 80 s, (f) 123 s, (g) 229 s, (h) 312 s, (i) 428 s.

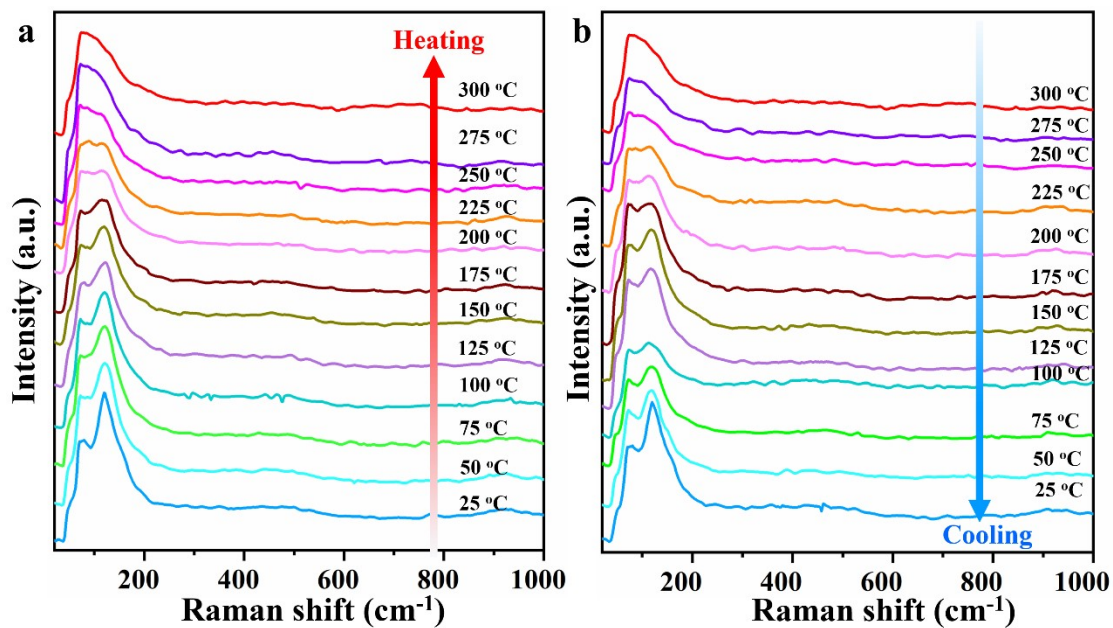

**Fig.S6** (a) Temperature-dependent Raman spectra acquired in the frequency range from 20 to 1000 cm<sup>-1</sup> during the heating process. (b) Temperature-dependent Raman spectra acquired in the frequency range from 20 to 1000 cm<sup>-1</sup> during the cooling process.



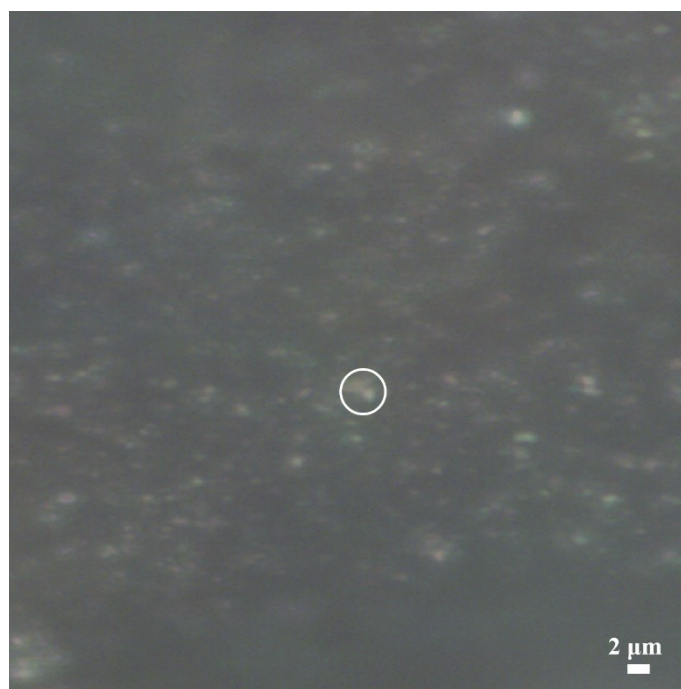

**Fig.S7** Optical image of Cu<sub>2</sub>Te after laser irradiation in Raman test.

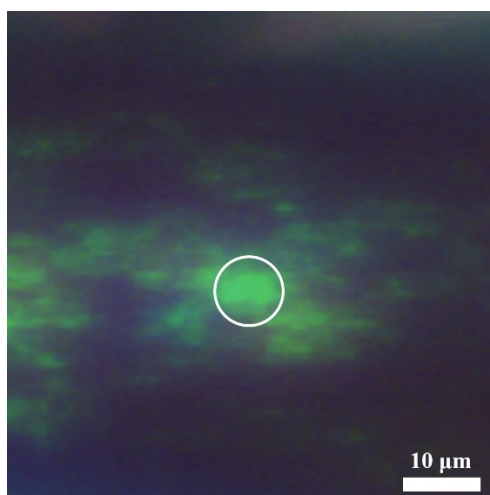

**Fig.S8** Optical image of  $\text{Cu}_2\text{Te}$  nanoplate under irradiation by a focused laser with a wavelength of 325 nm and an intensity of 0.3 mW.

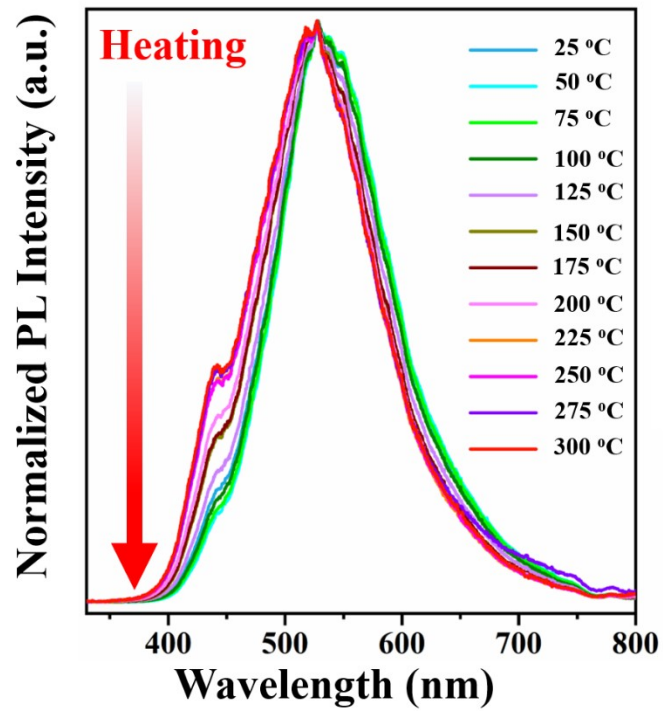

**Fig.S9** Temperature-dependent normalized PL spectra of Cu<sub>2</sub>Te nanoplate during the heating process.

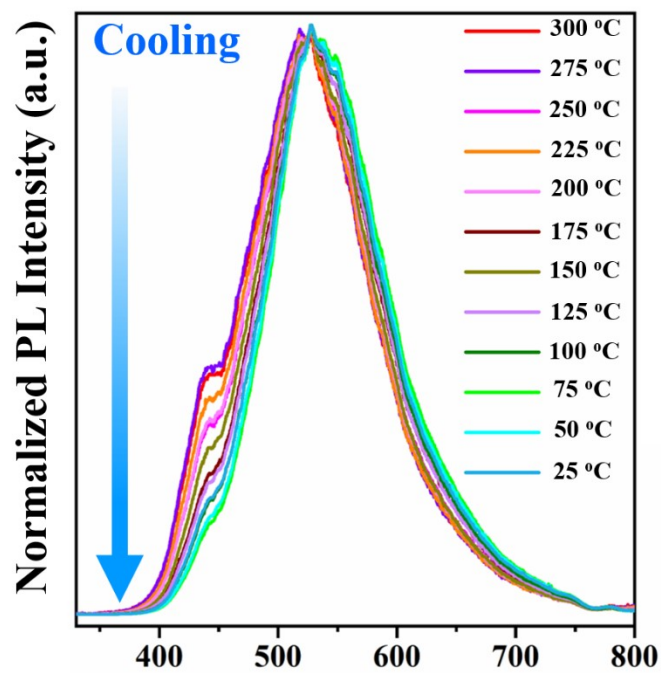

**Fig.S10** Temperature-dependent normalized PL spectra of Cu<sub>2</sub>Te nanoplate during the cooling process.

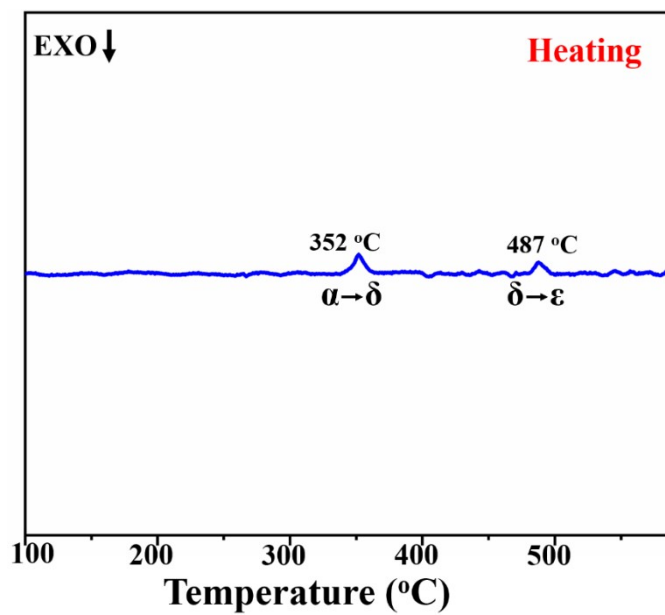

**Fig. S11** DSC profiles of Cu<sub>2</sub>Te nanoplate under flowing argon.

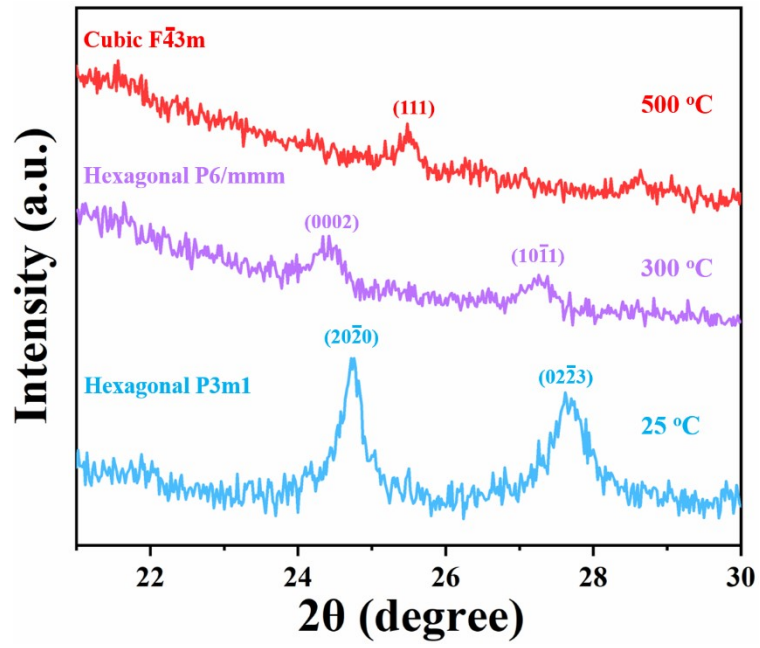

Fig. S12 HTXRD pattern of Cu<sub>2</sub>Te nanoplate at different temperature.

**Video M1.** Video M1 shows the reversible phase transformation of  $\text{Cu}_2\text{Te}$  from  $\alpha$  phase to  $\delta$  phase at the cycling heating temperatures range from 25 °C-325 °C-25 °C. The video is presented at 80 times actual speed.

**Video M2.** Video M2 shows the structural evolution of  $\text{Cu}_2\text{Te}$  nanoplate at elevated temperature of 575 °C. The image of Fig.3 corresponds to a frame captured from this video. The video is presented at 16 times actual speed.
